# Supplementary material for: Isotope pattern deconvolution for internal mass bias correction in the characterisation of isotopically enriched spikes
Source: Royal Society of Chemistry journal article supplement (doi:10.1039/b710595a), 2007-11-23
Supplement: table.doc [file table.doc]

This journal © The Royal Society of Chemistry 2007

**Table S1** Uncertainty propagation for the determination of the molybdenum content in the 95Mo spike by Isotope Pattern Deconvolution.

|  | Blend 1 | **Blend 2** | **Blend 3** |
| --- | --- | --- | --- |
| *x*nat | 0.31235 | 0.50661 | 0.58094 |
| *x*enr | 0.68768 | 0.49344 | 0.41912 |
| u(*x*nat) | 0.00009 | 0.00016 | 0.00018 |
| u(*x*enr) | 0.00004 | 0.00007 | 0.00008 |
| mass natMo (g) | 0.0733 | 0.1105 | 0.1288 |
| u(mass natMo) (g) | 0.0001 | 0.0001 | 0.0001 |
| Mass fraction natMo (ng g-1) | 8192.8 | | |
| u(mass fraction natMo) (ng g-1) | 23.8 | | |
| atomic weight natMo (g mol-1) | 95.938 | | |
| u(atomic weight natMo) (g mol-1) | 0.001 | | |
| nmols natMo added | 6.260 | 9.436 | 11.000 |
| u(nmols natMo) | 0.020 | 0.029 | 0.033 |
| mass 95Mo (g) | 0.1638 | 0.1088 | 0.0937 |
| u(mass 95Mo) (g) | 0.0001 | 0.0001 | 0.0001 |
| atomic weight 95Mo (g mol-1) | 94.984 | | |
| u(atomic weight 95Mo) (g mol-1) | 0.001 | | |
| nmols 95Mo found | 13.781 | 9.191 | 7.935 |
| u(nmols 95Mo) | 0.044 | 0.028 | 0.024 |
| Mass fraction 95Mo (mg kg-1) | 7.991 | 8.024 | 8.044 |
| u(mass fraction 95Mo) (mg kg-1) | 0.026 | 0.026 | 0.026 |
| Average mass fraction 95Mo (mg kg-1) | 8.020 | | |
| U(mass fraction 95Mo) (k=2) (mg kg-1) | 0.052 | | |
